# Supplementary material
Source: publisher figshare collection journal article supplement (https://tandf.figshare.com/ndownloader/files/21520725)
Supplement: Supplementary file 1 [file 21520725]

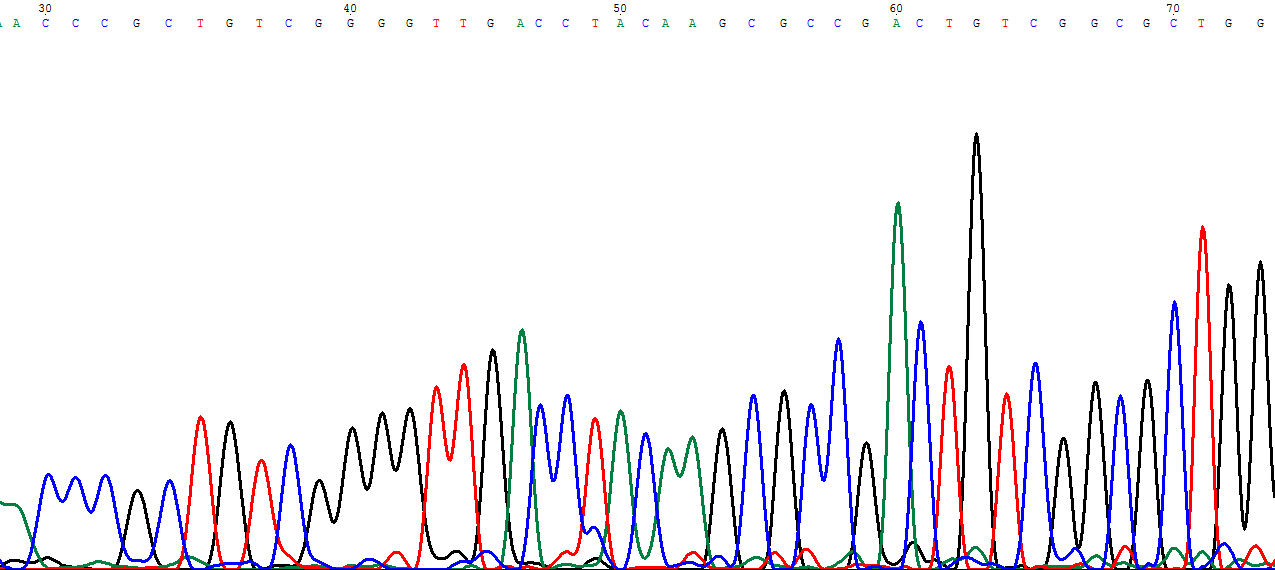


1. *rpoB* His445Tyr (position 49 C→T)


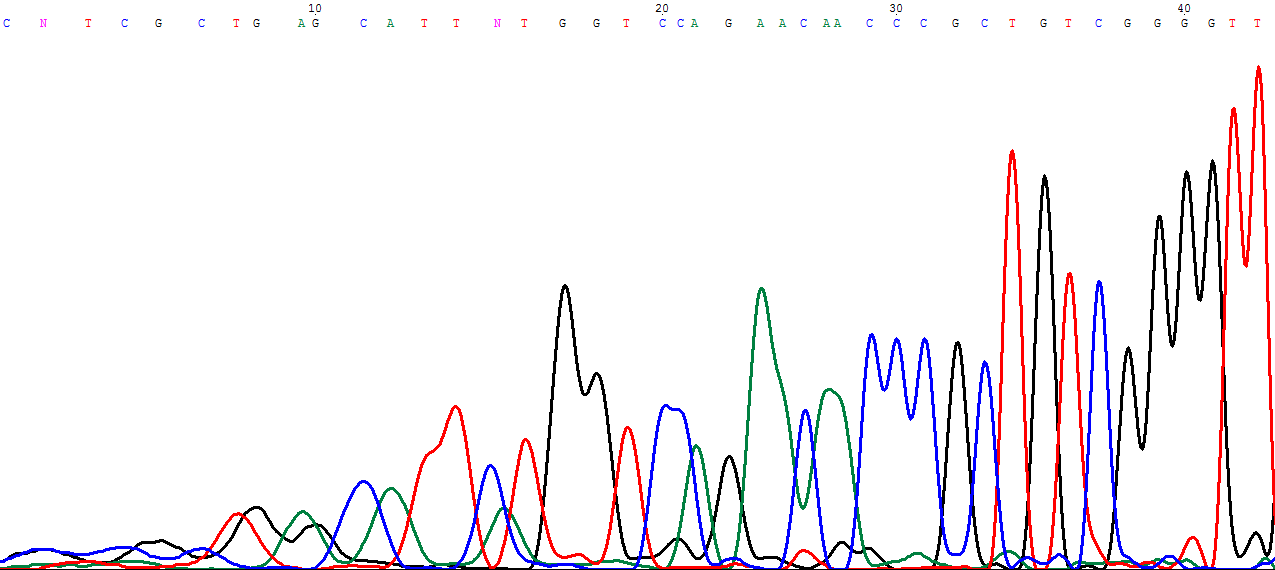


1. *rpoB* Asp435 Val (position 19 A→T)


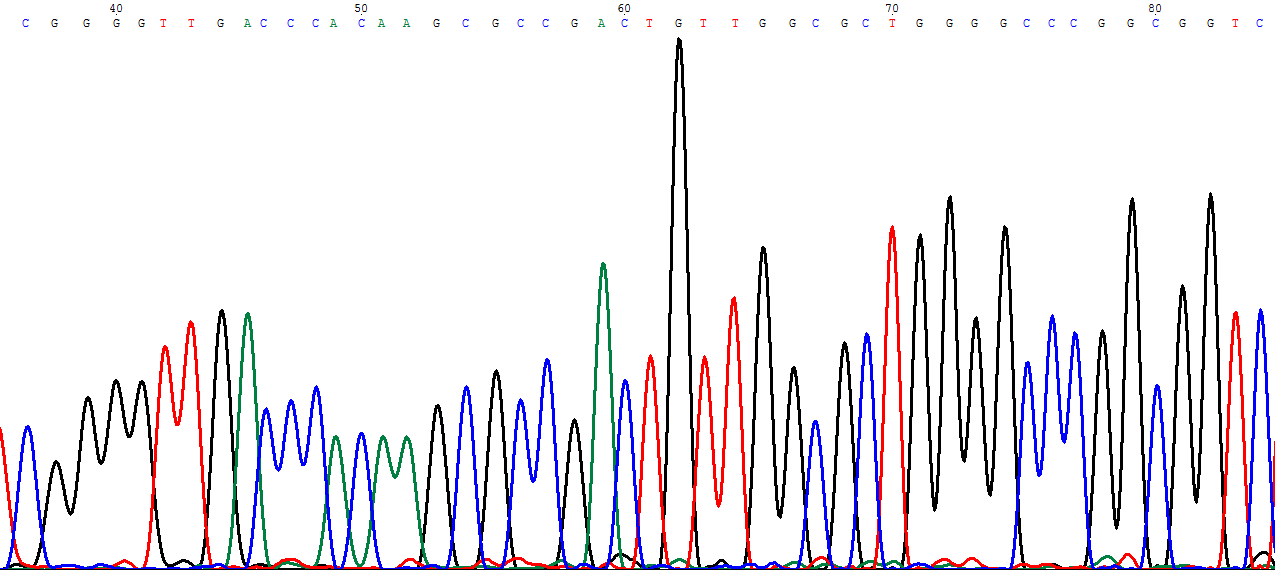


1. *rpoB* Ser450Leu (position 64 C→T)


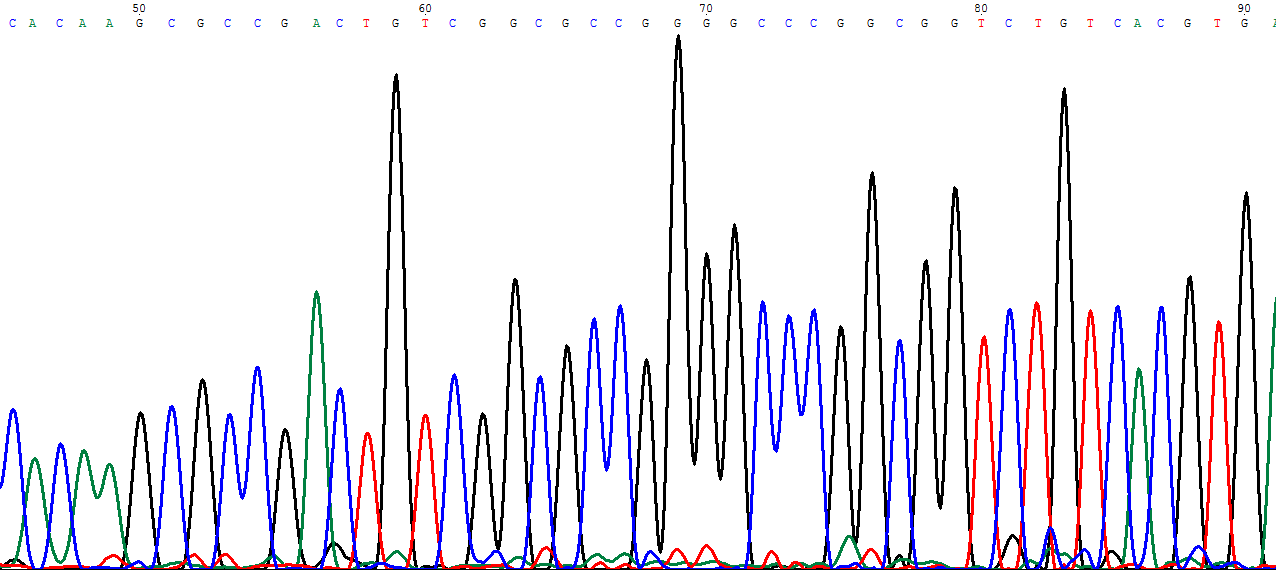


1. *rpoB* Leu452Pro (position 67 T→C)


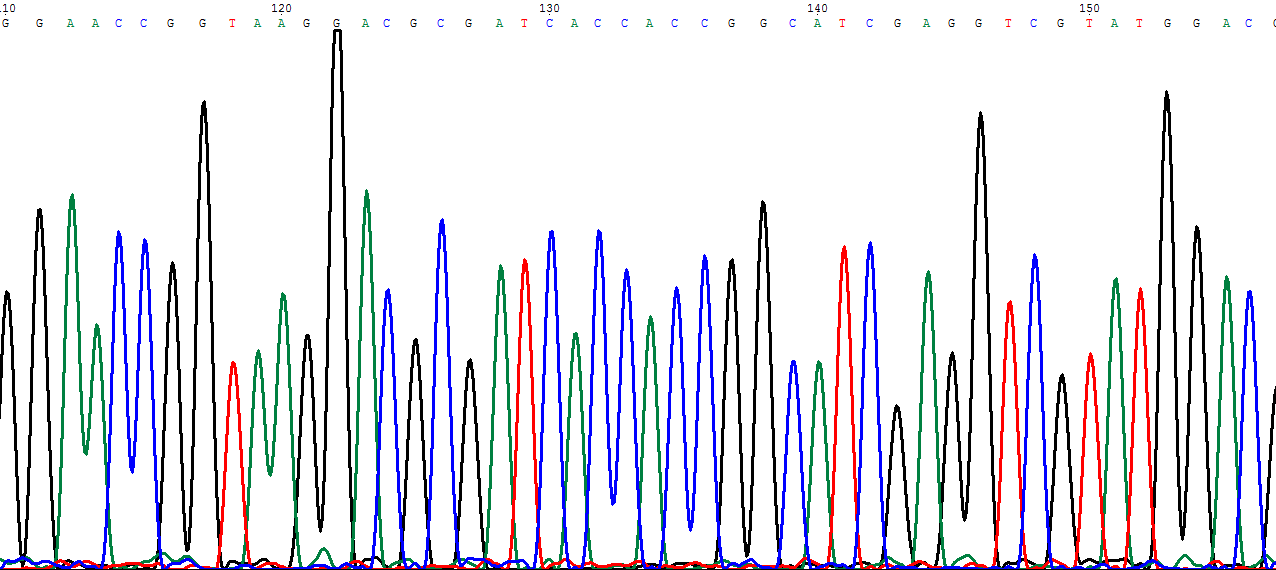


1. *katG* Ser315Thr (position 135 G→C)


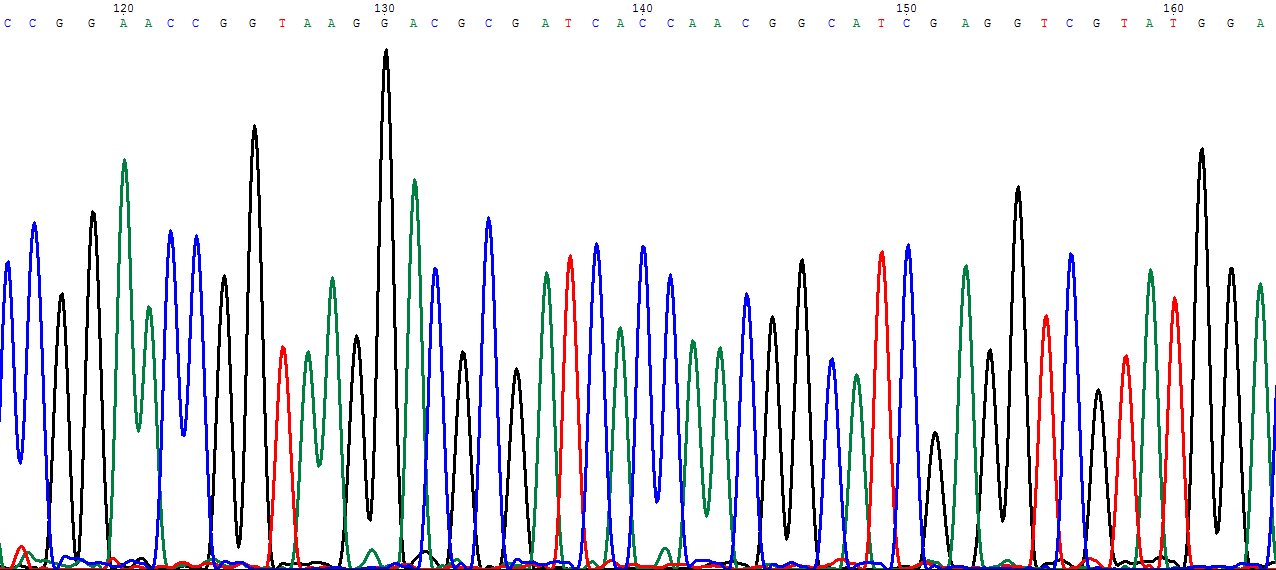


1. *katG* Ser315Asn (position 143 G→A)


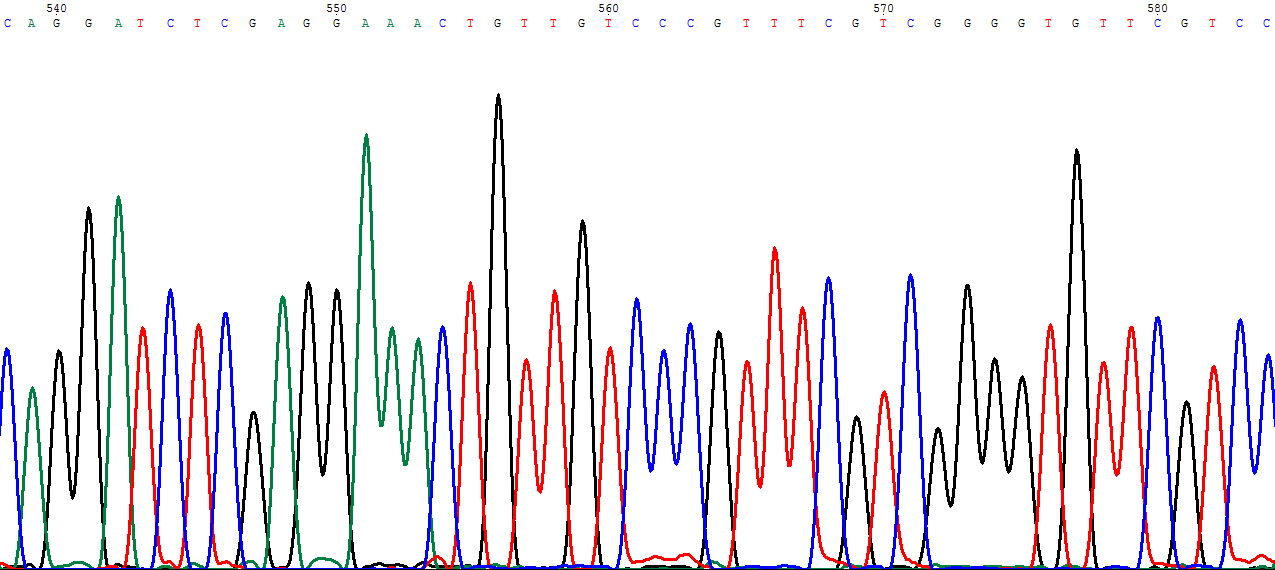


1. *katG* Trp328Arg (position 564 T→C) (reverse strand)


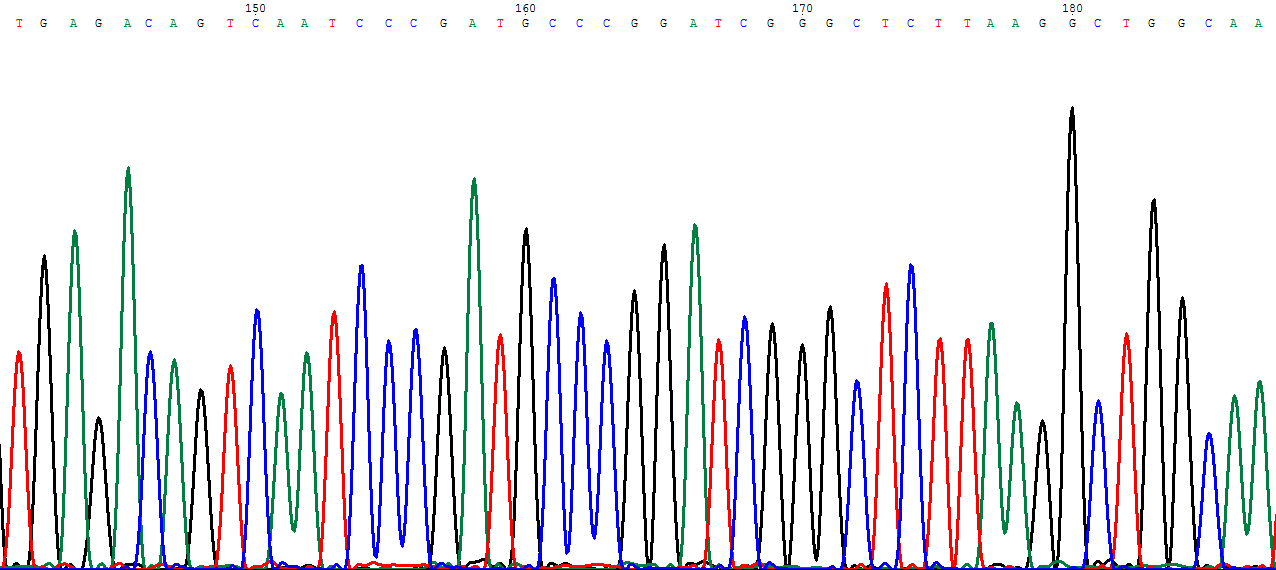


1. *katG* Gln461Pro (position 169 A→C) (reverse strand)


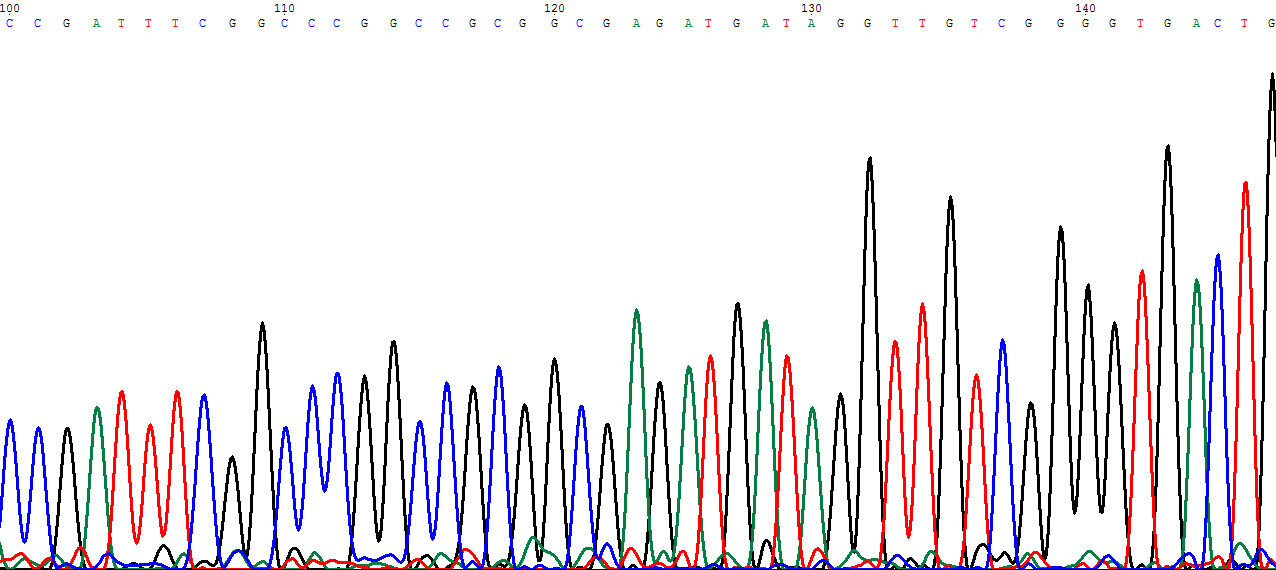


1. *inhA* promoter -15 C→T (position 126)


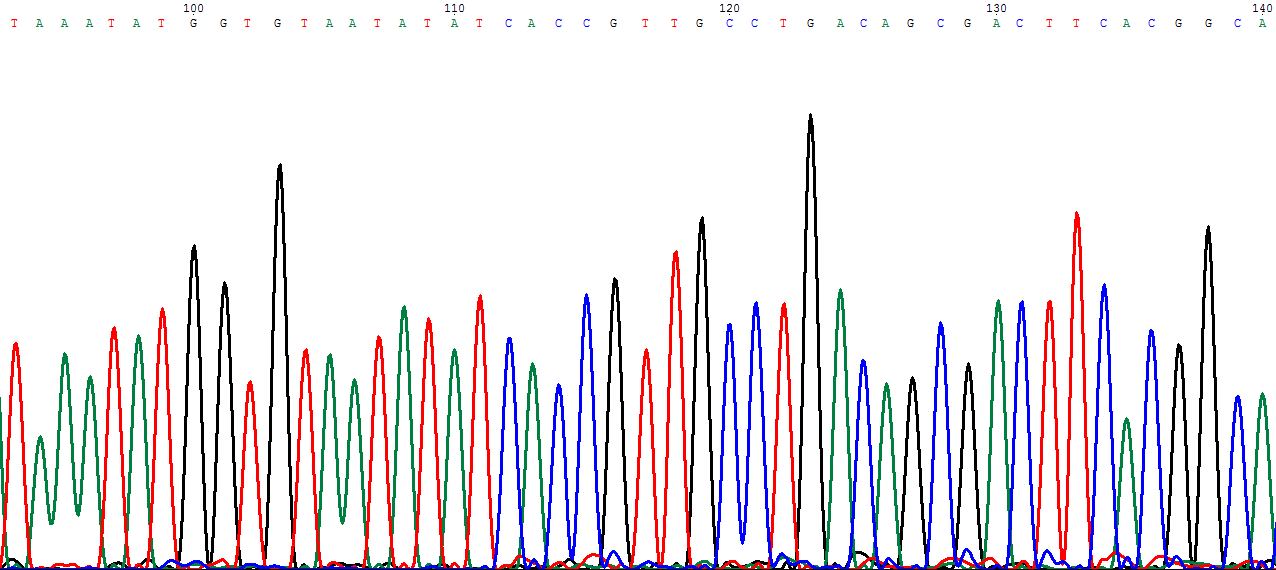


1. *oxyR-ahpC* -77T→G (position 116)


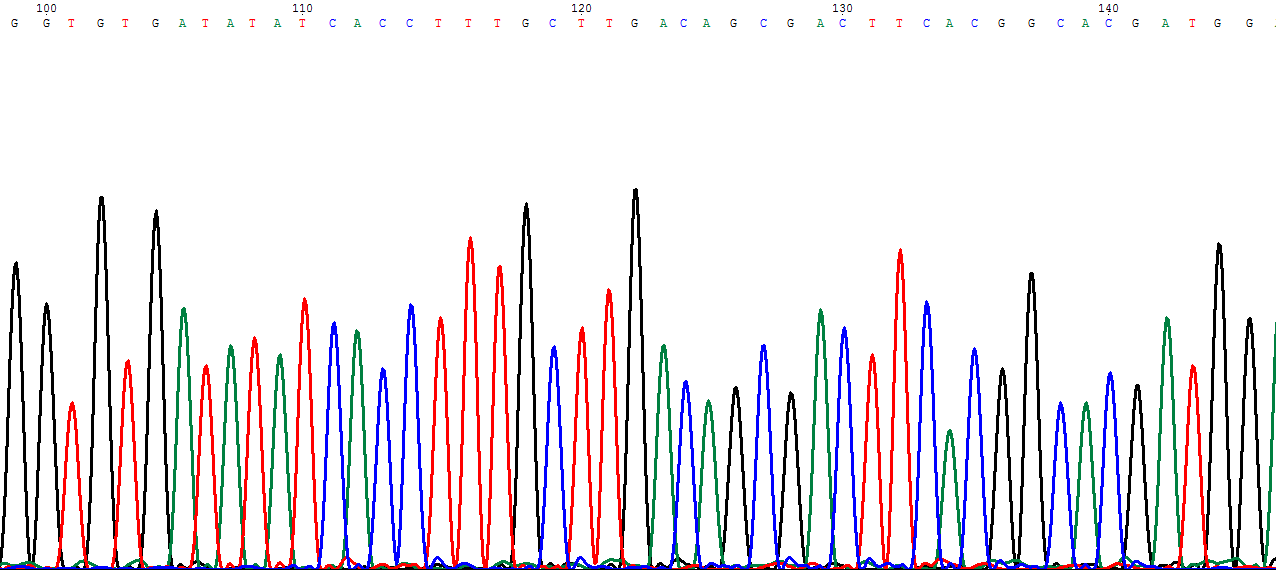


1. *oxyR-ahpC* -72 C→T (point mutation 120)


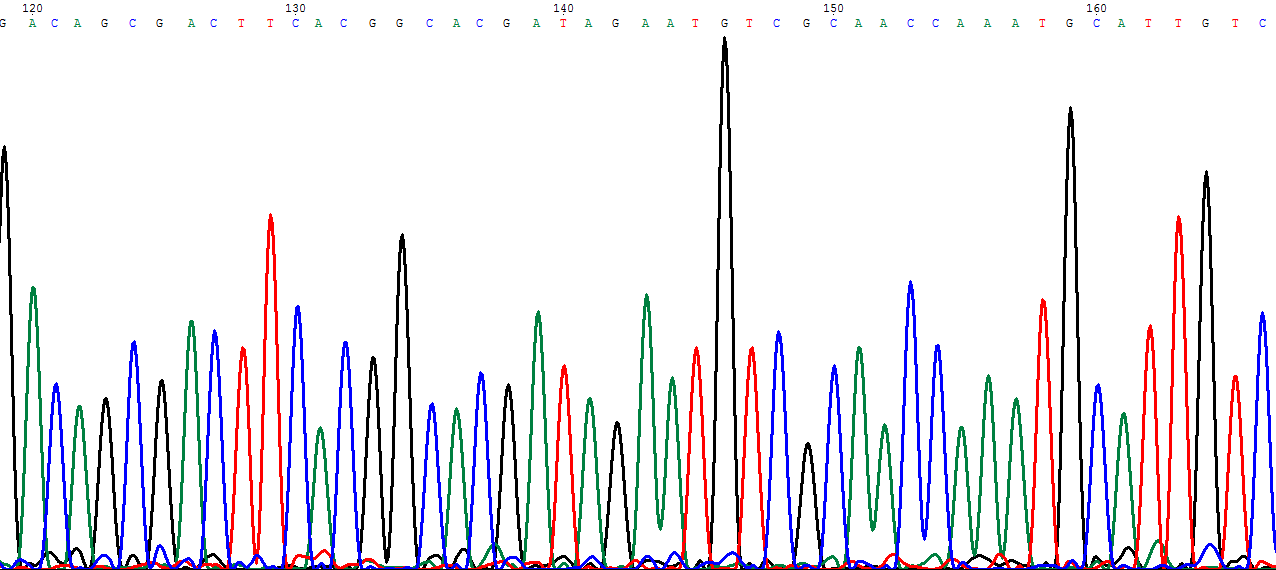


1. *oxyR-ahpC* -48 G→A (point mutation 141)


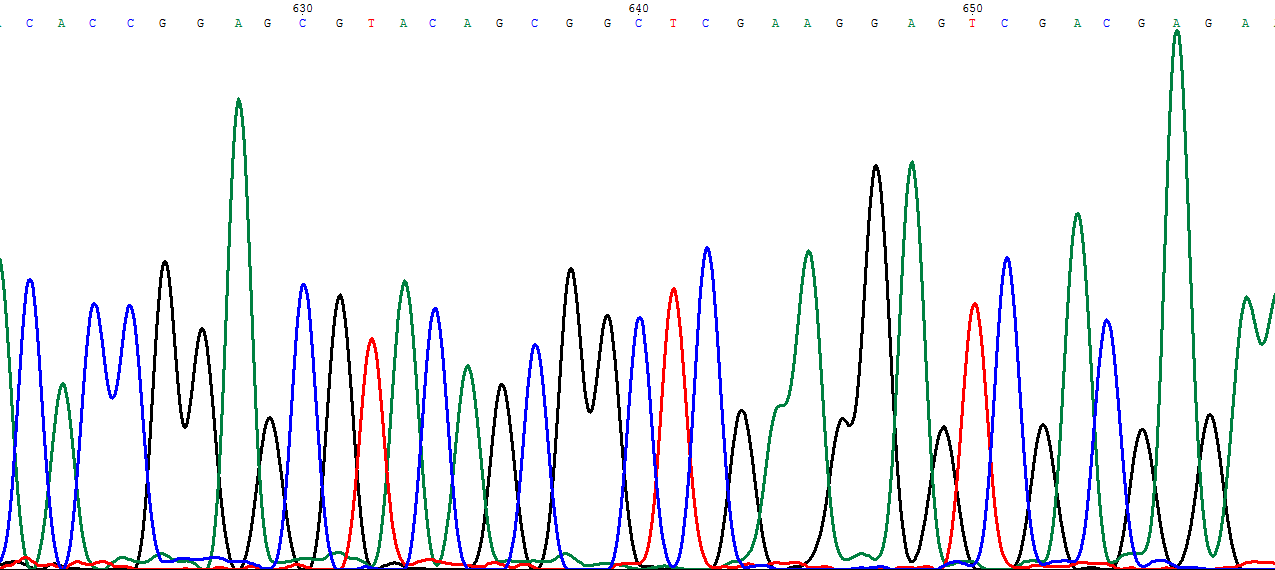


1. *pncA* ∆T416 (position 641, Thymine has been delated)

Figure S1. Chromatogram of mutations found in *rpoB*, *katG*, *inhA*, *oxyR-ahpC* and *pncA* genes (a-n).
